# Supplementary material for: Comparative Compositions of Grain of Bread Wheat, Emmer and Spelt Grown with Different Levels of Nitrogen Fertilisation
Source: MDPI journal article supplement (doi:10.3390/foods12040843), 2023-02-16
Supplement: s1 [file s1]

**Table S1.** Means and SEMs of the contents of minerals and metabolites in grains of individual genotypes of the three cereal types grown in four environments.

Some variables required transformation, square root (Sqrt) or log<sub>e</sub> (log) to meet the assumptions of the analysis.

|                     | Akteur   | Bernstein | Capo    | Kometus  | RGT Reform | Ramses  | Roter Heidfelder | Späths Albjuwel | Attengauer | Bauländer | Comburger | Franckenkorn | Zollernspelt | SEM      |
|---------------------|----------|-----------|---------|----------|------------|---------|------------------|-----------------|------------|-----------|-----------|--------------|--------------|----------|
| %N                  | 1.999    | 1.973     | 2.186   | 1.943    | 1.883      | 2.397   | 2.291            | 2.409           | 2.784      | 2.463     | 2.618     | 2.552        | 2.61         | 0.04234  |
| log(Ca)             | 5.802    | 5.662     | 6.047   | 5.805    | 5.622      | 5.944   | 5.732            | 5.834           | 5.722      | 5.641     | 5.872     | 5.593        | 5.869        | 0.02955  |
| log(Fe)             | 3.672    | 3.576     | 3.608   | 3.615    | 3.665      | 3.673   | 3.69             | 3.689           | 3.985      | 3.867     | 3.947     | 3.996        | 3.838        | 0.04708  |
| Mg                  | 1066     | 1023      | 1271    | 1047     | 1014       | 1287    | 1295             | 1347            | 1286       | 1234      | 1344      | 1368         | 1324         | 17.49    |
| Zn                  | 28.21    | 25.38     | 26.91   | 24.32    | 24.39      | 39.62   | 32.72            | 38.64           | 36.69      | 36.85     | 38.48     | 38.28        | 37.58        | 0.934    |
| Total phenolics     | 2887     | 2751      | 2914    | 2851     | 2761       | 2562    | 2881             | 2915            | 2863       | 2723      | 2937      | 3011         | 2934         | 35.48    |
| raffinose           | 5.667    | 5.984     | 6.18    | 6.172    | 5.732      | 6.805   | 7.218            | 6.288           | 7.017      | 6.867     | 6.445     | 6.883        | 6.935        | 0.1033   |
| log(sucrose)        | 2.269    | 2.46      | 2.464   | 2.415    | 2.393      | 2.567   | 2.653            | 2.519           | 2.547      | 2.56      | 2.415     | 2.411        | 2.416        | 0.018    |
| log(maltose)        | 1.499    | 1.622     | 1.81    | 1.593    | 1.578      | 2.085   | 2.219            | 2.164           | 1.436      | 1.475     | 1.349     | 1.42         | 1.355        | 0.06982  |
| beta galactose      | 0.3577   | 0.3705    | 0.3413  | 0.3489   | 0.3413     | 0.3621  | 0.3826           | 0.3697          | 0.3952     | 0.3603    | 0.3729    | 0.379        | 0.352        | 0.00974  |
| Log (total glucose) | 0.2976   | 0.3075    | 0.3948  | 0.3156   | 0.3194     | 0.4559  | 0.5059           | 0.4806          | 0.3451     | 0.3284    | 0.2844    | 0.284        | 0.2354       | 0.0295   |
| fructose            | 4.794    | 5.781     | 4.911   | 5.495    | 5.564      | 3.223   | 3.977            | 3.567           | 4.582      | 5.799     | 4.082     | 4.317        | 4.348        | 0.164    |
| glutamine           | 0.3045   | 0.2912    | 0.2896  | 0.3176   | 0.3251     | 0.2655  | 0.3061           | 0.2823          | 0.3126     | 0.3366    | 0.3015    | 0.3123       | 0.2743       | 0.01015  |
| glutamate           | 1.803    | 1.806     | 1.868   | 1.784    | 1.907      | 2.084   | 2.248            | 2.13            | 2.17       | 2.272     | 2.188     | 2.299        | 2.137        | 0.04053  |
| Log (glycine)       | -0.13674 | 0.02492   | 0.02179 | -0.01742 | -0.01497   | 0.0397  | 0.11566          | -0.00539        | 0.04826    | 0.08358   | -0.0646   | -0.04155     | -0.03709     | 0.0143   |
| Log (alanine)       | -2.119   | -2.123    | -2.066  | -2.155   | -2.075     | -1.969  | -1.939           | -1.918          | -1.945     | -1.832    | -2.002    | -1.934       | -1.967       | 0.01717  |
| aspartate           | 0.6365   | 0.6275    | 0.5903  | 0.6781   | 0.7282     | 0.6785  | 0.7044           | 0.6929          | 0.683      | 0.8161    | 0.6269    | 0.6393       | 0.7857       | 0.01778  |
| Log (asparagine)    | -0.7219  | -0.6903   | -0.576  | -0.7175  | -0.4955    | -0.3974 | -0.2484          | -0.3522         | -0.2876    | -0.0668   | -0.3606   | -0.3445      | -0.2021      | 0.03892  |
| GABA                | 0.2377   | 0.2329    | 0.2406  | 0.233    | 0.2493     | 0.2613  | 0.2833           | 0.269           | 0.2785     | 0.2735    | 0.2832    | 0.299        | 0.277        | 0.005901 |
| isoleucine          | 0.08145  | 0.08108   | 0.08408 | 0.08359  | 0.08678    | 0.08157 | 0.09195          | 0.0868          | 0.09093    | 0.09157   | 0.09245   | 0.10133      | 0.08807      | 0.001474 |

|                           |         |         |        |         |         |         |         |         |         |         |         |         |         |          |
|---------------------------|---------|---------|--------|---------|---------|---------|---------|---------|---------|---------|---------|---------|---------|----------|
| leucine                   | 0.1214  | 0.1187  | 0.1213 | 0.1169  | 0.1275  | 0.1304  | 0.1443  | 0.1388  | 0.1399  | 0.1432  | 0.1394  | 0.1502  | 0.1352  | 0.002183 |
| valine                    | 0.1384  | 0.1368  | 0.1395 | 0.1383  | 0.1465  | 0.1466  | 0.1662  | 0.158   | 0.1567  | 0.1676  | 0.156   | 0.1693  | 0.1535  | 0.00265  |
| threonine                 | 0.1252  | 0.1172  | 0.1262 | 0.1127  | 0.1342  | 0.1078  | 0.1156  | 0.1111  | 0.1388  | 0.1344  | 0.1354  | 0.1464  | 0.1316  | 0.002963 |
| tryptophan                | 0.7982  | 0.5733  | 0.6684 | 0.7659  | 0.6113  | 0.54    | 0.7633  | 0.7014  | 0.6156  | 0.6355  | 0.6701  | 0.7474  | 0.7288  | 0.02068  |
| phenylalanine             | 0.05856 | 0.05925 | 0.0542 | 0.06088 | 0.05411 | 0.06485 | 0.06858 | 0.07128 | 0.06544 | 0.06907 | 0.0622  | 0.06437 | 0.06326 | 0.001839 |
| Sqrt (tyrosine)           | 0.2619  | 0.2669  | 0.2529 | 0.2607  | 0.258   | 0.2828  | 0.2995  | 0.2912  | 0.2707  | 0.2846  | 0.2673  | 0.2721  | 0.2714  | 0.003785 |
| malic acid                | 1.729   | 1.89    | 1.634  | 1.854   | 2.102   | 2.232   | 1.997   | 2.028   | 1.94    | 2.307   | 1.87    | 1.957   | 1.955   | 0.04014  |
| Sqrt (glycine betaine)    | 1.146   | 1.159   | 1.022  | 1.25    | 1.143   | 1.242   | 1.223   | 1.183   | 1.237   | 1.22    | 1.291   | 1.25    | 1.27    | 0.009285 |
| choline                   | 0.1687  | 0.1759  | 0.2074 | 0.175   | 0.1736  | 0.2102  | 0.223   | 0.2201  | 0.2295  | 0.2133  | 0.2142  | 0.2163  | 0.2182  | 0.00288  |
| Sqrt (fumaric acid)       | 0.07716 | 0.09289 | 0.0462 | 0.07805 | 0.10661 | 0.11088 | 0.07064 | 0.07964 | 0.07448 | 0.09854 | 0.06113 | 0.05163 | 0.0676  | 0.00308  |
| Log (acetate)             | 0.1024  | 0.1071  | 0.1091 | 0.1109  | 0.1156  | 0.1069  | 0.1144  | 0.1124  | 0.1082  | 0.1223  | 0.1091  | 0.1124  | 0.1114  | 0.00329  |
| Sqrt (galactinol)         | 0.4845  | 0.4671  | 0.4658 | 0.4983  | 0.4418  | 0.6403  | 0.6232  | 0.5894  | 0.5122  | 0.527   | 0.5242  | 0.515   | 0.5299  | 0.009356 |
| inositol                  | 2.866   | 3.167   | 3.137  | 3.274   | 2.996   | 3.137   | 3.457   | 2.874   | 3.644   | 3.364   | 3.15    | 3.243   | 3.277   | 0.0491   |
|                           |         |         |        |         |         |         |         |         |         |         |         |         |         |          |
| Log (total amino acids)   | 1.764   | 1.749   | 1.782  | 1.779   | 1.815   | 1.839   | 1.95    | 1.883   | 1.896   | 1.971   | 1.87    | 1.92    | 1.911   | 0.01755  |
| Total organic acids       | 1.908   | 2.09    | 1.789  | 2.043   | 2.324   | 2.449   | 2.182   | 2.22    | 2.123   | 2.528   | 2.04    | 2.121   | 2.134   | 0.04178  |
| Log (total methyl donors) | 0.3916  | 0.4172  | 0.2221 | 0.5516  | 0.3904  | 0.5592  | 0.5399  | 0.4809  | 0.5629  | 0.5286  | 0.6293  | 0.5741  | 0.6031  | 0.01379  |
| Log (total sugars)        | 3.268   | 3.407   | 3.431  | 3.387   | 3.362   | 3.515   | 3.612   | 3.512   | 3.415   | 3.479   | 3.31    | 3.348   | 3.343   | 0.01894  |

**Table S2.** Means and SEMs of minerals and metabolites in genotypes of the three cereal types grown at 100 and 200 kg N/Ha.

Some variables required transformation, square root (Sqrt) or log<sub>e</sub> (log) to meet the assumptions of the analysis.

|                     | 100 kg N    |           |        |         |            |        |                  |                  |            |           |           |              |              |
|---------------------|-------------|-----------|--------|---------|------------|--------|------------------|------------------|------------|-----------|-----------|--------------|--------------|
|                     | bread wheat |           |        |         |            | emmer  |                  |                  | spelt      |           |           |              |              |
|                     | Akteur      | Bernstein | Capo   | Kometus | RGT Reform | Ramses | Roter Heidfelder | Späths Albujuwel | Attengauer | Bauländer | Comburger | Franckenkorn | Zollernspelt |
| %N                  | 1.736       | 1.72      | 1.94   | 1.728   | 1.696      | 2.187  | 1.982            | 2.118            | 2.541      | 2.206     | 2.342     | 2.269        | 2.411        |
| log(Ca)             | 5.77        | 5.613     | 6.004  | 5.781   | 5.54       | 5.938  | 5.686            | 5.752            | 5.718      | 5.597     | 5.856     | 5.579        | 5.799        |
| log(Fe)             | 3.617       | 3.446     | 3.593  | 3.594   | 3.574      | 3.603  | 3.606            | 3.596            | 4.063      | 3.778     | 3.861     | 3.879        | 3.738        |
| Mg                  | 1076        | 1003      | 1240   | 1056    | 1030       | 1338   | 1312             | 1374             | 1298       | 1248      | 1332      | 1362         | 1314         |
| Zn                  | 26.66       | 22.89     | 24.78  | 24.07   | 23.64      | 38.3   | 30.81            | 36.57            | 33.63      | 33.9      | 35.06     | 35.16        | 34.12        |
| total phenolics     | 2828        | 2689      | 2902   | 2750    | 2761       | 2500   | 2821             | 2904             | 2943       | 2686      | 3009      | 3054         | 2976         |
| raffinose           | 5.652       | 5.977     | 6.18   | 6.226   | 5.716      | 7.173  | 7.6              | 6.458            | 7.213      | 6.851     | 6.546     | 6.969        | 7.002        |
| Log (sucrose)       | 2.265       | 2.473     | 2.48   | 2.428   | 2.383      | 2.608  | 2.725            | 2.572            | 2.574      | 2.577     | 2.434     | 2.42         | 2.435        |
| Log (maltose)       | 1.518       | 1.667     | 1.842  | 1.561   | 1.541      | 1.997  | 2.179            | 2.261            | 1.511      | 1.499     | 1.375     | 1.378        | 1.343        |
| galactose           | 0.3597      | 0.391     | 0.3414 | 0.3479  | 0.3454     | 0.3777 | 0.3625           | 0.3945           | 0.414      | 0.355     | 0.3801    | 0.3782       | 0.3513       |
| Log (total glucose) | 0.2817      | 0.313     | 0.39   | 0.2868  | 0.292      | 0.4227 | 0.4773           | 0.5276           | 0.387      | 0.3122    | 0.2893    | 0.2675       | 0.2251       |
| fructose            | 5.109       | 6.131     | 5.208  | 5.854   | 5.77       | 3.483  | 4.377            | 3.828            | 4.814      | 6.021     | 4.197     | 4.517        | 4.493        |

|                        |         |        |         |         |         |         |         |         |        |         |         |         |         |
|------------------------|---------|--------|---------|---------|---------|---------|---------|---------|--------|---------|---------|---------|---------|
| glutamine              | 0.2844  | 0.263  | 0.2664  | 0.2967  | 0.2878  | 0.254   | 0.2871  | 0.2588  | 0.291  | 0.2774  | 0.2949  | 0.3147  | 0.2694  |
| glutamate              | 1.719   | 1.846  | 1.838   | 1.717   | 1.859   | 2.063   | 2.215   | 2.111   | 2.113  | 2.155   | 2.149   | 2.238   | 2.092   |
| Log (glycine)          | -0.1303 | 0.045  | 0.04277 | -0.0007 | -0.0196 | 0.06939 | 0.16616 | 0.02287 | 0.078  | 0.09754 | -0.0457 | -0.0266 | -0.0193 |
| Log (alanine)          | -2.183  | -2.116 | -2.091  | -2.186  | -2.121  | -2.014  | -1.976  | -1.976  | -1.976 | -1.927  | -2.022  | -1.943  | -1.998  |
| aspartate              | 0.5911  | 0.623  | 0.5732  | 0.6342  | 0.6907  | 0.6665  | 0.683   | 0.6376  | 0.642  | 0.7901  | 0.6111  | 0.6305  | 0.7537  |
| Log (asparagine)       | -0.8322 | -0.717 | -0.6375 | -0.7881 | -0.5851 | -0.4637 | -0.3049 | -0.4833 | -0.42  | -0.1998 | -0.4526 | -0.4181 | -0.3065 |
| GABA                   | 0.2275  | 0.24   | 0.2372  | 0.2251  | 0.2443  | 0.261   | 0.2847  | 0.2667  | 0.273  | 0.2628  | 0.2785  | 0.2929  | 0.2718  |
| isoleucine             | 0.07688 | 0.082  | 0.08283 | 0.08012 | 0.08395 | 0.0818  | 0.08986 | 0.08446 | 0.089  | 0.08459 | 0.09099 | 0.10054 | 0.08497 |
| leucine                | 0.1146  | 0.12   | 0.1194  | 0.1124  | 0.1231  | 0.1297  | 0.1406  | 0.1363  | 0.137  | 0.1338  | 0.1364  | 0.1469  | 0.1309  |
| valine                 | 0.1293  | 0.137  | 0.1368  | 0.1324  | 0.1402  | 0.1445  | 0.1587  | 0.1518  | 0.152  | 0.1521  | 0.1525  | 0.166   | 0.1467  |
| threonine              | 0.1218  | 0.119  | 0.1273  | 0.1116  | 0.1307  | 0.1079  | 0.1167  | 0.1075  | 0.137  | 0.1265  | 0.1322  | 0.1473  | 0.1275  |
| tryptophan             | 0.7117  | 0.575  | 0.6863  | 0.7095  | 0.5916  | 0.5599  | 0.7389  | 0.7027  | 0.675  | 0.6355  | 0.7158  | 0.7866  | 0.7424  |
| phenylalanine          | 0.05511 | 0.061  | 0.05377 | 0.05776 | 0.05274 | 0.06446 | 0.06335 | 0.07214 | 0.066  | 0.06446 | 0.06119 | 0.06411 | 0.05907 |
| sqrt(tyrosine)         | 0.2565  | 0.271  | 0.2526  | 0.2571  | 0.2552  | 0.2884  | 0.3066  | 0.2959  | 0.272  | 0.28    | 0.2663  | 0.2693  | 0.2671  |
| malic acid             | 1.654   | 1.947  | 1.652   | 1.83    | 2.075   | 2.17    | 1.96    | 2.013   | 1.922  | 2.201   | 1.822   | 1.94    | 1.914   |
| Sqrt (glycine betaine) | 1.142   | 1.168  | 1.046   | 1.229   | 1.141   | 1.246   | 1.229   | 1.186   | 1.251  | 1.219   | 1.318   | 1.269   | 1.28    |
| choline                | 0.1614  | 0.169  | 0.2022  | 0.1718  | 0.1692  | 0.2116  | 0.2199  | 0.2129  | 0.225  | 0.2086  | 0.2095  | 0.2116  | 0.2141  |
| Sqrt (fumeric acid)    | 0.07257 | 0.09   | 0.04427 | 0.07297 | 0.09559 | 0.10798 | 0.07116 | 0.08162 | 0.068  | 0.09616 | 0.0584  | 0.04781 | 0.06359 |
| Log (acetate)          | 0.1021  | 0.113  | 0.1029  | 0.1072  | 0.1099  | 0.1134  | 0.1117  | 0.1106  | 0.103  | 0.1147  | 0.103   | 0.1079  | 0.1039  |
| Sqrt (galactinol)      | 0.5122  | 0.527  | 0.5242  | 0.515   | 0.5299  | 0.6504  | 0.6248  | 0.6165  | 0.516  | 0.5245  | 0.5192  | 0.5087  | 0.5258  |
| inositol               | 2.817   | 3.173  | 3.159   | 3.27    | 2.979   | 3.254   | 3.557   | 2.839   | 3.771  | 3.395   | 3.251   | 3.344   | 3.344   |
|                        |         |        |         |         |         |         |         |         |        |         |         |         |         |
| log(total amino acids) | 1.707   | 1.755  | 1.771   | 1.74    | 1.776   | 1.833   | 1.938   | 1.855   | 1.872  | 1.918   | 1.857   | 1.909   | 1.884   |

|                           |        |       |        |        |        |        |        |        |       |        |        |        |        |
|---------------------------|--------|-------|--------|--------|--------|--------|--------|--------|-------|--------|--------|--------|--------|
| total organic acids       | 1.829  | 2.15  | 1.799  | 2.01   | 2.28   | 2.392  | 2.143  | 2.205  | 2.093 | 2.412  | 1.983  | 2.096  | 2.081  |
| Log (total methyl donors) | 0.3802 | 0.426 | 0.2571 | 0.5185 | 0.3839 | 0.5663 | 0.5478 | 0.4808 | 0.58  | 0.5245 | 0.6625 | 0.5967 | 0.6133 |
| Log (sugar)               | 3.279  | 3.431 | 3.456  | 3.398  | 3.353  | 3.525  | 3.641  | 3.568  | 3.453 | 3.501  | 3.328  | 3.349  | 3.355  |

|                     | 200 kg N    |           |         |         |            |         |                  |                  |            |           |           |              |              | SEM      |
|---------------------|-------------|-----------|---------|---------|------------|---------|------------------|------------------|------------|-----------|-----------|--------------|--------------|----------|
|                     | bread wheat |           |         |         | emmer      |         |                  | spelt            |            |           |           |              |              |          |
|                     | Akteur      | Bernstein | Capo    | Kometus | RGT Reform | Ramses  | Roter Heidfelder | Späths Albujuwel | Attengauer | Bauländer | Comburger | Franckenkorn | Zollernspelt |          |
|                     |             |           |         |         |            |         |                  |                  |            |           |           |              |              |          |
| %N                  | 2.263       | 2.226     | 2.432   | 2.158   | 2.071      | 2.607   | 2.601            | 2.7              | 3.026      | 2.72      | 2.894     | 2.835        | 2.809        | 0.06828  |
| log(Ca)             | 5.833       | 5.711     | 6.091   | 5.829   | 5.705      | 5.95    | 5.779            | 5.916            | 5.725      | 5.685     | 5.889     | 5.606        | 5.94         | 0.04192  |
| log(Fe)             | 3.727       | 3.706     | 3.623   | 3.636   | 3.757      | 3.742   | 3.775            | 3.783            | 3.906      | 3.957     | 4.032     | 4.114        | 3.938        | 0.06632  |
| Mg                  | 1057        | 1043      | 1301    | 1038    | 997        | 1235    | 1278             | 1321             | 1274       | 1221      | 1355      | 1373         | 1335         | 26.07    |
| Zn                  | 29.76       | 27.86     | 29.04   | 24.56   | 25.14      | 40.94   | 34.64            | 40.72            | 39.76      | 39.79     | 41.9      | 41.4         | 41.03        | 1.442    |
|                     |             |           |         |         |            |         |                  |                  |            |           |           |              |              |          |
| Total phenolics     | 2946        | 2813      | 2925    | 2952    | 2761       | 2623    | 2940             | 2925             | 2783       | 2760      | 2866      | 2968         | 2893         | 5254     |
|                     |             |           |         |         |            |         |                  |                  |            |           |           |              |              |          |
| raffinose           | 5.681       | 5.992     | 6.181   | 6.117   | 5.749      | 6.438   | 6.837            | 6.118            | 6.822      | 6.883     | 6.344     | 6.796        | 6.869        | 0.1467   |
| Log (sucrose)       | 2.273       | 2.448     | 2.447   | 2.403   | 2.402      | 2.526   | 2.581            | 2.467            | 2.52       | 2.544     | 2.397     | 2.402        | 2.398        | 0.02481  |
| Log (maltose)       | 1.48        | 1.577     | 1.779   | 1.625   | 1.615      | 2.172   | 2.26             | 2.068            | 1.361      | 1.451     | 1.322     | 1.461        | 1.367        | 0.09744  |
| galactose           | 0.3556      | 0.3501    | 0.3413  | 0.3498  | 0.3372     | 0.3465  | 0.403            | 0.3449           | 0.3763     | 0.3657    | 0.3656    | 0.3797       | 0.3526       | 0.01435  |
| Log (total glucose) | 0.3135      | 0.3018    | 0.3996  | 0.3445  | 0.3468     | 0.4892  | 0.535            | 0.4336           | 0.303      | 0.3447    | 0.2796    | 0.3005       | 0.2457       | 0.04158  |
| fructose            | 4.48        | 5.431     | 4.614   | 5.135   | 5.359      | 2.963   | 3.578            | 3.306            | 4.349      | 5.577     | 3.967     | 4.116        | 4.202        | 0.2482   |
| glutamine           | 0.3245      | 0.3193    | 0.3127  | 0.3384  | 0.3624     | 0.2771  | 0.325            | 0.3059           | 0.3345     | 0.3958    | 0.3081    | 0.3099       | 0.2793       | 0.01437  |
| glutamate           | 1.887       | 1.766     | 1.898   | 1.851   | 1.955      | 2.105   | 2.28             | 2.149            | 2.228      | 2.389     | 2.228     | 2.36         | 2.182        | 0.06024  |
| Log (glycine)       | -0.1431     | 0.00491   | 0.0008  | -0.0342 | -0.0103    | 0.01002 | 0.065            | -0.0337          | 0.01823    | 0.06962   | -0.0835   | -0.0565      | -0.0549      | 0.02011  |
| Log (alanine)       | -2.055      | -2.13     | -2.04   | -2.124  | -2.029     | -1.924  | -1.901           | -1.86            | -1.915     | -1.737    | -1.982    | -1.924       | -1.936       | 0.02597  |
| aspartate           | 0.6819      | 0.6321    | 0.6074  | 0.7221  | 0.7656     | 0.6905  | 0.726            | 0.7481           | 0.7246     | 0.8422    | 0.6427    | 0.6481       | 0.8177       | 0.02613  |
| Log (asparagine)    | -0.6116     | -0.6639   | -0.5144 | -0.6468 | -0.4059    | -0.3312 | -0.192           | -0.2212          | -0.1553    | 0.0661    | -0.2687   | -0.2709      | -0.0977      | 0.05474  |
| GABA                | 0.2479      | 0.2253    | 0.2441  | 0.2409  | 0.2543     | 0.2616  | 0.282            | 0.2712           | 0.2843     | 0.2841    | 0.288     | 0.305        | 0.2822       | 0.008687 |
| isoleucine          | 0.08602     | 0.08052   | 0.08534 | 0.08706 | 0.0896     | 0.08134 | 0.094            | 0.08914          | 0.09306    | 0.09855   | 0.09392   | 0.10212      | 0.09116      | 0.002208 |
| leucine             | 0.1283      | 0.1177    | 0.1233  | 0.1215  | 0.1318     | 0.1311  | 0.148            | 0.1414           | 0.143      | 0.1526    | 0.1423    | 0.1536       | 0.1395       | 0.003224 |
| valine              | 0.1475      | 0.1363    | 0.1421  | 0.1442  | 0.1529     | 0.1486  | 0.174            | 0.1641           | 0.1619     | 0.1831    | 0.1595    | 0.1726       | 0.1604       | 0.003958 |
| threonine           | 0.1287      | 0.1153    | 0.1252  | 0.1137  | 0.1376     | 0.1078  | 0.114            | 0.1147           | 0.1403     | 0.1422    | 0.1385    | 0.1456       | 0.1356       | 0.004198 |

|                           |         |         |         |         |         |         |       |         |         |         |         |         |         |          |
|---------------------------|---------|---------|---------|---------|---------|---------|-------|---------|---------|---------|---------|---------|---------|----------|
| tryptophan                | 0.8847  | 0.5719  | 0.6505  | 0.8222  | 0.6311  | 0.5202  | 0.788 | 0.7     | 0.5564  | 0.6356  | 0.6245  | 0.7082  | 0.7152  | 0.02951  |
| phenylalanine             | 0.062   | 0.05778 | 0.05462 | 0.064   | 0.05549 | 0.06524 | 0.074 | 0.07042 | 0.06443 | 0.07368 | 0.06321 | 0.06462 | 0.06745 | 0.002636 |
| Sqrt (tyrosine)           | 0.2673  | 0.2624  | 0.2531  | 0.2643  | 0.2608  | 0.2771  | 0.292 | 0.2864  | 0.2695  | 0.2891  | 0.2682  | 0.2749  | 0.2757  | 0.005324 |
| malic acid                | 1.803   | 1.833   | 1.616   | 1.879   | 2.129   | 2.293   | 2.034 | 2.043   | 1.958   | 2.413   | 1.918   | 1.973   | 1.997   | 0.06305  |
| Sqrt (glycine betaine)    | 1.15    | 1.151   | 0.998   | 1.272   | 1.145   | 1.237   | 1.216 | 1.18    | 1.223   | 1.22    | 1.264   | 1.231   | 1.26    | 0.01613  |
| choline                   | 0.176   | 0.1824  | 0.2125  | 0.1781  | 0.1779  | 0.2087  | 0.226 | 0.2272  | 0.2342  | 0.2179  | 0.2189  | 0.2211  | 0.2223  | 0.004091 |
| Sqrt (fumaric acid)       | 0.08176 | 0.0954  | 0.04812 | 0.08314 | 0.11763 | 0.11377 | 0.07  | 0.07767 | 0.08057 | 0.10093 | 0.06385 | 0.05546 | 0.0716  | 0.00507  |
| Log (acetate)             | 0.1027  | 0.1009  | 0.1153  | 0.1145  | 0.1213  | 0.1005  | 0.117 | 0.1141  | 0.1136  | 0.1298  | 0.1153  | 0.1168  | 0.1189  | 0.004889 |
| Sqrt (galactinol)         | 0.4859  | 0.4629  | 0.4714  | 0.4997  | 0.4375  | 0.6302  | 0.622 | 0.5623  | 0.5085  | 0.5295  | 0.5292  | 0.5213  | 0.5339  | 0.01304  |
| inositol                  | 2.914   | 3.162   | 3.115   | 3.278   | 3.014   | 3.021   | 3.358 | 2.909   | 3.516   | 3.334   | 3.049   | 3.143   | 3.211   | 0.06833  |
|                           |         |         |         |         |         |         |       |         |         |         |         |         |         |          |
| Log(total amino acids)    | 1.82    | 1.743   | 1.794   | 1.818   | 1.854   | 1.845   | 1.962 | 1.91    | 1.919   | 2.023   | 1.883   | 1.931   | 1.938   | 0.02526  |
| Total organic acids       | 1.988   | 2.029   | 1.779   | 2.076   | 2.368   | 2.507   | 2.221 | 2.235   | 2.153   | 2.644   | 2.097   | 2.145   | 2.187   | 0.06654  |
| Log (total methyl donors) | 0.4031  | 0.4086  | 0.1872  | 0.5848  | 0.3969  | 0.5521  | 0.532 | 0.4809  | 0.5462  | 0.5328  | 0.5961  | 0.5515  | 0.593   | 0.02359  |
| log(total sugars)         | 3.258   | 3.383   | 3.407   | 3.376   | 3.37    | 3.505   | 3.584 | 3.456   | 3.377   | 3.457   | 3.291   | 3.346   | 3.332   | 0.02684  |

**Table S3.** Means and SEMs of contents of polar metabolites in grains of the three cereal types grown in four environments at two N levels

Some variables required transformation, square root (Sqrt) or log<sub>e</sub> (log) to meet the assumptions of the analysis.

|                    | 100            |         |         | 200            |         |         |          |                    |
|--------------------|----------------|---------|---------|----------------|---------|---------|----------|--------------------|
|                    | bread<br>wheat | emmer   | spelt   | bread<br>wheat | emmer   | spelt   | SEMemmer | SEM<br>bread&spelt |
|                    |                |         |         |                |         |         |          |                    |
| Raffinose          | 5.95           | 7.077   | 6.916   | 5.944          | 6.465   | 6.743   | 0.08549  | 0.06681            |
| log(sucrose)       | 2.406          | 2.635   | 2.488   | 2.395          | 2.525   | 2.452   | 0.01354  | 0.00984            |
| log(maltose)       | 1.626          | 2.146   | 1.421   | 1.615          | 2.166   | 1.392   | 0.05472  | 0.041116           |
| galactose          | 0.3571         | 0.3783  | 0.3757  | 0.3468         | 0.3647  | 0.368   | 0.008904 | 0.007348           |
| log(total glucose) | 0.3127         | 0.4759  | 0.2962  | 0.3412         | 0.4858  | 0.2947  | 0.02384  | 0.01834            |
| fructose           | 5.614          | 3.896   | 4.809   | 5.004          | 3.282   | 4.442   | 0.1605   | 0.1364             |
| glutamine          | 0.2797         | 0.2666  | 0.2894  | 0.3315         | 0.3027  | 0.3255  | 0.00831  | 0.006448           |
| glutamate          | 1.796          | 2.13    | 2.149   | 1.871          | 2.178   | 2.277   | 0.03793  | 0.03164            |
| log(glycine)       | -0.01257       | 0.08614 | 0.01684 | -0.03639       | 0.01384 | -0.0214 | 0.011484 | 0.008795           |
| log(alanine)       | -2.139         | -1.989  | -1.973  | -2.076         | -1.895  | -1.899  | 0.01678  | 0.01424            |
| aspartate          | 0.6224         | 0.6624  | 0.6854  | 0.6818         | 0.7215  | 0.735   | 0.01617  | 0.01331            |
| log(asparagine)    | -0.7119        | -0.4173 | -0.3594 | -0.5685        | -0.2481 | -0.1453 | 0.03125  | 0.02393            |
| GABA               | 0.2349         | 0.2708  | 0.2757  | 0.2425         | 0.2716  | 0.2887  | 0.005389 | 0.004445           |
| isoleucine         | 0.08108        | 0.08537 | 0.08998 | 0.08571        | 0.08817 | 0.09576 | 0.001406 | 0.001182           |
| leucine            | 0.1178         | 0.1355  | 0.1369  | 0.1245         | 0.1401  | 0.1462  | 0.00201  | 0.001665           |
| valine             | 0.1352         | 0.1517  | 0.1538  | 0.1446         | 0.1621  | 0.1675  | 0.00251  | 0.002105           |



|                       |         |         |         |         |         |         |          |          |
|-----------------------|---------|---------|---------|---------|---------|---------|----------|----------|
| threonine             | 0.1221  | 0.1107  | 0.1342  | 0.1241  | 0.1123  | 0.1405  | 0.002433 | 0.01892  |
| tryptophan            | 0.6547  | 0.6671  | 0.711   | 0.7121  | 0.6693  | 0.648   | 0.01735  | 0.01367  |
| phenylalanine         | 0.05602 | 0.06665 | 0.06306 | 0.05878 | 0.06982 | 0.06668 | 0.001563 | 0.001241 |
| sqrt(tyrosine)        | 0.2586  | 0.297   | 0.2709  | 0.2616  | 0.2853  | 0.2755  | 0.00304  | 0.002329 |
| malic acid            | 1.831   | 2.048   | 1.96    | 1.852   | 2.123   | 2.052   | 0.04274  | 0.03737  |
| sqrt(glycine betaine) | 1.145   | 1.22    | 1.267   | 1.143   | 1.211   | 1.24    | 0.01205  | 0.01105  |
| choline               | 0.1748  | 0.2148  | 0.2137  | 0.1854  | 0.2207  | 0.2229  | 0.002383 | 0.001862 |
| sqrt(fumeric acid)    | 0.07516 | 0.08692 | 0.06687 | 0.08521 | 0.08719 | 0.07448 | 0.003613 | 0.003245 |
| log(acetate)          | 0.1071  | 0.1119  | 0.1065  | 0.1109  | 0.1105  | 0.1189  | 0.003078 | 0.002567 |
| sqrt(galactinol)      | 0.4716  | 0.6305  | 0.5188  | 0.4715  | 0.6047  | 0.5245  | 0.007351 | 0.005554 |
| Inositol              | 3.08    | 3.216   | 3.421   | 3.097   | 3.096   | 3.25    | 0.03813  | 0.02848  |

**Table S4.** p values from ANOVA of the contents of polar metabolites in grains of the three cereal types grown in four environments at two N levels

Statistically significant values ( $p < 0.05$ ) are highlighted.

Some variables required transformation, square root (Sqrt) or  $\log_e$  (log) to meet the assumptions of the analysis.

|                        | Nlevel | Grain  | Nlevel.<br>Grain | Grain.genotype.<br>Bread | Grain.genotype.<br>Emmer | Grain.genotype.<br>Spelt | Nlevel. Grain.<br>genotype.<br>Bread wheat | Nlevel. Grain.<br>genotype. Emmer | Nlevel.Grain.genotype.<br>Spelt |
|------------------------|--------|--------|------------------|--------------------------|--------------------------|--------------------------|--------------------------------------------|-----------------------------------|---------------------------------|
| rtaffinose             | 0.005  | <0.001 | <0.001           | <0.001                   | <0.001                   | 0.001                    | 0.988                                      | 0.271                             | 0.709                           |
| Log (sucrose)          | <0.001 | <0.001 | <0.001           | <0.001                   | <0.001                   | <0.001                   | 0.798                                      | 0.465                             | 0.973                           |
| Log (maltose)          | 0.747  | <0.001 | 0.889            | 0.029                    | 0.392                    | 0.662                    | 0.883                                      | 0.155                             | 0.811                           |
| galactose              | 0.225  | 0.002  | 0.918            | 0.17                     | 0.327                    | 0.02                     | 0.518                                      | 0.003                             | 0.431                           |
| Log (total<br>glucose) | 0.435  | <0.001 | 0.721            | 0.143                    | 0.489                    | 0.078                    | 0.909                                      | 0.099                             | 0.593                           |
| fructose               | 0.007  | <0.001 | 0.423            | <0.001                   | 0.006                    | <0.001                   | 0.967                                      | 0.787                             | 0.984                           |
| glutamine              | <0.001 | 0.005  | 0.399            | 0.05                     | 0.019                    | <0.001                   | 0.743                                      | 0.7                               | <0.001                          |
| glutamate              | 0.025  | <0.001 | 0.361            | 0.166                    | 0.014                    | 0.022                    | 0.231                                      | 0.969                             | 0.677                           |
| Log (glycine)          | <0.001 | <0.001 | 0.068            | <0.001                   | <0.001                   | <0.001                   | 0.676                                      | 0.469                             | 0.937                           |
| Log (alanine)          | <0.001 | <0.001 | 0.492            | 0.001                    | 0.111                    | <0.001                   | 0.053                                      | 0.714                             | 0.005                           |
| aspartate              | 0.002  | <0.001 | 0.893            | <0.001                   | 0.589                    | <0.001                   | 0.395                                      | 0.196                             | 0.713                           |
| Log<br>(asparagine)    | <0.001 | <0.001 | 0.352            | <0.001                   | 0.022                    | <0.001                   | 0.624                                      | 0.34                              | 0.78                            |

|                        |        |        |        |        |        |        |       |       |       |
|------------------------|--------|--------|--------|--------|--------|--------|-------|-------|-------|
| GABA                   | 0.114  | <0.001 | 0.366  | 0.263  | 0.029  | 0.024  | 0.25  | 0.912 | 0.957 |
| isoleucine             | 0.005  | <0.001 | 0.383  | 0.048  | <0.001 | <0.001 | 0.12  | 0.399 | 0.029 |
| leucine                | 0.002  | <0.001 | 0.331  | 0.011  | <0.001 | <0.001 | 0.112 | 0.623 | 0.183 |
| valine                 | <0.001 | <0.001 | 0.415  | 0.081  | <0.001 | <0.001 | 0.108 | 0.329 | 0.007 |
| threonine              | 0.058  | <0.001 | 0.417  | <0.001 | 0.181  | 0.006  | 0.592 | 0.501 | 0.317 |
| tryptophan             | 0.898  | 0.596  | <0.001 | <0.001 | <0.001 | <0.001 | 0.002 | 0.317 | 0.244 |
| phenylalanine          | 0.022  | <0.001 | 0.933  | 0.026  | 0.048  | 0.086  | 0.307 | 0.049 | 0.127 |
| Sqrt (tyrosine)        | 0.908  | <0.001 | 0.008  | 0.118  | 0.008  | 0.018  | 0.399 | 0.909 | 0.803 |
| malic acid             | 0.202  | <0.001 | 0.345  | <0.001 | <0.001 | <0.001 | 0.191 | 0.722 | 0.511 |
| Sqrt (glycine betaine) | 0.358  | <0.001 | 0.087  | <0.001 | <0.001 | <0.001 | 0.014 | 0.951 | 0.305 |
| Choline                | <0.001 | <0.001 | 0.535  | <0.001 | 0.005  | <0.001 | 0.852 | 0.109 | 1     |
| Sqrt (fumaric acid)    | 0.121  | <0.001 | 0.083  | <0.001 | <0.001 | <0.001 | 0.407 | 0.625 | 0.896 |
| Log (acetate)          | 0.021  | 0.027  | 0.008  | <0.001 | 0.326  | 0.018  | 0.029 | 0.219 | 0.752 |
| Sqrt (galactinol)      | 0.399  | <0.001 | 0.061  | <0.001 | <0.001 | 0.605  | 0.935 | 0.146 | 0.951 |
| inositol               | 0.002  | <0.001 | 0.009  | <0.001 | <0.001 | <0.001 | 0.883 | 0.06  | 0.678 |

**Table S5.** Means and SEMs for AXOS and GOS in grains of the three cereal types grown at 100 and 200 kgN/Ha  
Some variables required transformation, square root (Sqrt) or log<sub>e</sub> (log) to meet the assumptions of the analysis.

|                           | 100    |        |        | 200    |        |        |              |                    |
|---------------------------|--------|--------|--------|--------|--------|--------|--------------|--------------------|
|                           | bread  | emmer  | spelt  | bread  | emmer  | spelt  | SEM<br>emmer | SEM<br>bread&spelt |
| sqrt(Xylose)              | 2.761  | 2.3    | 2.753  | 2.803  | 2.318  | 2.736  | 0.03207      | 0.02603            |
| sqrt(Xyl2)                | 3.08   | 2.743  | 3.105  | 3.131  | 2.745  | 3.15   | 0.03744      | 0.03075            |
| sqrt(Xyl3)                | 1.272  | 0.979  | 1.226  | 1.287  | 0.921  | 1.206  | 0.03594      | 0.02818            |
| sqrt(Xyl5)                | 0.8531 | 0.9449 | 0.9822 | 0.825  | 0.9258 | 0.9673 | 0.03181      | 0.02469            |
| sqrt(G3)                  | 2.41   | 2.014  | 2.537  | 2.326  | 1.919  | 2.431  | 0.02493      | 0.02059            |
| sqrt(G4)                  | 1.547  | 1.264  | 1.687  | 1.509  | 1.22   | 1.623  | 0.01569      | 0.0125             |
| sqrt(XA3XX)               | 2.063  | 1.541  | 1.872  | 2.06   | 1.513  | 1.843  | 0.01834      | 0.01468            |
| sqrt(XA2_3XX)             | 1.58   | 1.196  | 1.354  | 1.586  | 1.171  | 1.344  | 0.0143       | 0.01082            |
| sqrt(XA3A3XX)             | 1.0305 | 0.6737 | 0.8593 | 1.007  | 0.6399 | 0.8471 | 0.01388      | 0.01106            |
| sqrt(XA3XA3XX)            | 0.4605 | 0.3669 | 0.4009 | 0.4688 | 0.3601 | 0.4037 | 0.006016     | 0.004579           |
| sqrt(XA3A2_3XX)           | 0.7378 | 0.5891 | 0.6429 | 0.7334 | 0.5723 | 0.663  | 0.011673     | 0.008902           |
| sqrt(XA3XA2_3XX)          | 1.0098 | 0.831  | 0.9662 | 1.0092 | 0.8165 | 0.9423 | 0.01261      | 0.00976            |
| log <sub>e</sub> (TOT-AX) | 3.369  | 3.004  | 3.308  | 3.388  | 2.99   | 3.306  | 0.01884      | 0.01552            |
| log <sub>e</sub> (TOT-BG) | 2.097  | 1.726  | 2.225  | 2.032  | 1.637  | 2.143  | 0.02135      | 0.01754            |
| Ratio G3:G4 GOS           | 2.429  | 2.54   | 2.268  | 2.381  | 2.477  | 2.252  | 0.02194      | 0.01725            |
| Ratio TOT-AXOS: TOT-BG    | 3.596  | 3.619  | 2.968  | 3.915  | 3.895  | 3.212  | 0.05261      | 0.04096            |
| Sqrt (Ratio M:D AXOS)     | 1.436  | 1.366  | 1.447  | 1.425  | 1.36   | 1.439  | 0.00587      | 0.004698           |

|                           | 100+200<br>bread | 100+200<br>emmer | 100+200<br>spelt | SEM emmer | SEM bread&spelt |
|---------------------------|------------------|------------------|------------------|-----------|-----------------|
|                           |                  |                  |                  |           |                 |
| sqrt(Xylose)              | 2.782            | 2.309            | 2.745            | 0.02095   | 0.01622         |
| sqrt(Xyl2)                | 3.106            | 2.744            | 3.128            | 0.02389   | 0.01851         |
| sqrt(Xyl3)                | 1.279            | 0.95             | 1.216            | 0.02494   | 0.01931         |
| sqrt(Xyl5)                | 0.839            | 0.9353           | 0.9748           | 0.02242   | 0.01737         |
| sqrt(G3)                  | 2.368            | 1.966            | 2.484            | 0.01572   | 0.01218         |
| sqrt(G4)                  | 1.528            | 1.242            | 1.655            | 0.010616  | 0.008223        |
| sqrt(XA3XX)               | 2.061            | 1.527            | 1.858            | 0.01229   | 0.00953         |
| sqrt(XA2_3XX)             | 1.583            | 1.184            | 1.349            | 0.010451  | 0.008096        |
| sqrt(XA3A3XX)             | 1.0187           | 0.6568           | 0.8532           | 0.009387  | 0.007271        |
| sqrt(XA3XA3XX)            | 0.4647           | 0.3635           | 0.4023           | 0.004362  | 0.003379        |
| sqrt(XA3A2_3XX)           | 0.7356           | 0.5807           | 0.6529           | 0.008442  | 0.006539        |
| sqrt(XA3XA2_3XX)          | 1.0095           | 0.8237           | 0.9543           | 0.008938  | 0.006923        |
| log <sub>e</sub> (TOT-AX) | 3.379            | 2.997            | 3.307            | 0.01194   | 0.00925         |
| log <sub>e</sub> (TOT-BG) | 2.065            | 1.682            | 2.184            | 0.01361   | 0.01054         |
| Ratio G3:G4 GOS           | 2.405            | 2.509            | 2.26             | 0.01515   | 0.01174         |
| Ratio TOT-AXOS: TOT-BG    | 3.756            | 3.757            | 3.09             | 0.03691   | 0.02859         |
| Sqrt (ratio M:D AXOS)     | 1.431            | 1.363            | 1.443            | 0.003936  | 0.003049        |

**Table S6.** p values from ANOVA of AXOS and GOS in the three types and genotypes of wheat.

Statistically significant values ( $p < 0.05$ ) are highlighted.

Some variables required transformation, square root (Sqrt) or  $\log_e$  (log) to meet the assumptions of the analysis.

|                  | Nlevel | Grain  | Nlevel.<br>Grain | Grain.<br>genotype.Bread<br>wheat | Grain.<br>genotype<br>Emmer | Grain.<br>genotype<br>Spelt | Nlevel.Grains.<br>genotype. Bread | Nlevel.Grains.<br>genotype. Emmer | Nlevel. Grain.<br>genotype.<br>Spelt |
|------------------|--------|--------|------------------|-----------------------------------|-----------------------------|-----------------------------|-----------------------------------|-----------------------------------|--------------------------------------|
| sqrt(Xylose)     | 0.62   | <0.001 | 0.436            | <0.001                            | 0.002                       | <0.001                      | 0.832                             | 0.688                             | 0.666                                |
| sqrt(Xyl2)       | 0.273  | <0.001 | 0.698            | <0.001                            | 0.033                       | <0.001                      | 0.412                             | 0.489                             | 0.85                                 |
| sqrt(Xyl3)       | 0.566  | <0.001 | 0.511            | <0.001                            | 0.004                       | 0.547                       | 0.08                              | 0.906                             | 0.464                                |
| sqrt(Xyl5)       | 0.359  | <0.001 | 0.963            | <0.001                            | <0.001                      | 0.217                       | 0.938                             | 0.8                               | 0.593                                |
| sqrt(G3)         | 0.001  | <0.001 | 0.809            | <0.001                            | 0.001                       | 0.347                       | 0.699                             | 0.526                             | 0.814                                |
| sqrt(G4)         | 0.002  | <0.001 | 0.5              | <0.001                            | 0.003                       | <0.001                      | 0.549                             | 0.665                             | 0.385                                |
| sqrt(XA3XX)      | 0.224  | <0.001 | 0.568            | <0.001                            | <0.001                      | <0.001                      | 0.659                             | 0.58                              | 0.856                                |
| sqrt(XA2_3XX)    | 0.411  | <0.001 | 0.487            | <0.001                            | 0.024                       | 0.072                       | 0.191                             | 0.557                             | 0.803                                |
| sqrt(XA3A3XX)    | 0.07   | <0.001 | 0.652            | <0.001                            | <0.001                      | 0.113                       | 0.495                             | 0.738                             | 0.749                                |
| sqrt(XA3XA3XX)   | 0.483  | <0.001 | 0.393            | <0.001                            | <0.001                      | 0.421                       | 0.131                             | 0.546                             | 0.229                                |
| sqrt(XA3A2_3XX)  | 0.77   | <0.001 | 0.184            | 0.129                             | 0.102                       | 0.005                       | 0.468                             | 0.822                             | 0.782                                |
| sqrt(XA3XA2_3XX) | 0.161  | <0.001 | 0.492            | <0.001                            | 0.046                       | 0.257                       | 0.323                             | 0.367                             | 0.797                                |

**Table S7.** Means and SEMs of AXOS in the genotypes of the three cereals grown in four environments

Some variables required transformation, square root (Sqrt) or log<sub>e</sub> (log) to meet the assumptions of the analysis.

|                   | Bread wheat |           |        |         |            | emmer  |                  |                 | spelt      |           |           |              |              | SEM      |
|-------------------|-------------|-----------|--------|---------|------------|--------|------------------|-----------------|------------|-----------|-----------|--------------|--------------|----------|
|                   | Akteur      | Bernstein | Capo   | Kometus | RGT Reform | Ramses | Roter Heidfelder | Späths Albjuwel | Attengauer | Bauländer | Comburger | Franckenkorn | Zollernspelt |          |
| Sqrt (Xylose)     | 2.718       | 2.921     | 2.917  | 2.674   | 2.681      | 2.349  | 2.372            | 2.206           | 2.625      | 2.592     | 2.853     | 2.848        | 2.806        | 0.03628  |
| Sqrt (Xyl2)       | 3.053       | 3.106     | 3.268  | 2.996   | 3.105      | 2.786  | 2.791            | 2.656           | 3.008      | 3.019     | 3.23      | 3.246        | 3.135        | 0.04138  |
| Sqrt (Xyl3)       | 1.18        | 1.316     | 1.455  | 1.147   | 1.298      | 1.021  | 0.996            | 0.833           | 1.175      | 1.184     | 1.26      | 1.249        | 1.213        | 0.04319  |
| Sqrt (Xyl5)       | 0.7484      | 0.8966    | 0.7627 | 0.9519  | 0.8355     | 0.9934 | 0.9995           | 0.813           | 1.0068     | 1.0112    | 0.8959    | 0.9712       | 0.9887       | 0.03884  |
| Sqrt (G3)         | 2.232       | 2.382     | 2.63   | 2.28    | 2.315      | 1.949  | 2.044            | 1.906           | 2.504      | 2.465     | 2.517     | 2.445        | 2.487        | 0.02723  |
| Sqrt (G4)         | 1.44        | 1.546     | 1.69   | 1.465   | 1.499      | 1.241  | 1.287            | 1.198           | 1.723      | 1.607     | 1.678     | 1.598        | 1.669        | 0.01839  |
| Sqrt (XA3XX)      | 1.961       | 2.217     | 2.235  | 1.857   | 2.037      | 1.471  | 1.634            | 1.477           | 1.905      | 1.81      | 1.905     | 1.793        | 1.875        | 0.02128  |
| Sqrt (XA2_3XX)    | 1.57        | 1.693     | 1.564  | 1.569   | 1.517      | 1.143  | 1.204            | 1.203           | 1.322      | 1.377     | 1.331     | 1.378        | 1.335        | 0.0181   |
| Sqrt (XA3A3XX)    | 0.9842      | 1.1387    | 1.061  | 0.8568  | 1.0529     | 0.6225 | 0.754            | 0.594           | 0.8422     | 0.8394    | 0.8927    | 0.8487       | 0.8429       | 0.01626  |
| Sqrt (XA3XA3XX)   | 0.4626      | 0.5019    | 0.4707 | 0.4215  | 0.4666     | 0.3495 | 0.3931           | 0.3479          | 0.4074     | 0.4057    | 0.4003    | 0.4079       | 0.3901       | 0.007555 |
| Sqrt (XA3A2_3XX)  | 0.7447      | 0.7647    | 0.7141 | 0.7255  | 0.7289     | 0.5638 | 0.5725           | 0.6058          | 0.6115     | 0.6846    | 0.6444    | 0.675        | 0.6493       | 0.01462  |
| Sqrt (XA3XA2_3XX) | 0.9836      | 1.0782    | 0.9917 | 0.9399  | 1.0543     | 0.8011 | 0.8541           | 0.8161          | 0.9844     | 0.9412    | 0.9526    | 0.9402       | 0.953        | 0.01548  |

**Table S8.** Means and SEMs of AXOS in the genotypes of the three cereals grown in four environments with 100 and 200 kg N/Ha

Some variables required transformation, square root (Sqrt) or log<sub>e</sub> (log) to meet the assumptions of the analysis.

|                  | 100 kg N    |           |        |         |            |        |                  |                 |            |           |           |              |              |
|------------------|-------------|-----------|--------|---------|------------|--------|------------------|-----------------|------------|-----------|-----------|--------------|--------------|
|                  | bread wheat |           |        |         |            | emmer  |                  |                 | spelt      |           |           |              |              |
|                  | Akteur      | Bernstein | Capo   | Kometus | RGT Reform | Ramses | Roter Heidfelder | Späths Albjuwel | Attengauer | Bauländer | Comburger | Franckenkorn | Zollernspelt |
| sqrt(Xylose)     | 2.707       | 2.893     | 2.927  | 2.625   | 2.655      | 2.329  | 2.389            | 2.183           | 2.588      | 2.603     | 2.89      | 2.856        | 2.83         |
| sqrt(Xyl2)       | 3.071       | 3.119     | 3.228  | 2.915   | 3.068      | 2.75   | 2.791            | 2.689           | 3.002      | 2.989     | 3.197     | 3.255        | 3.082        |
| sqrt(Xyl3)       | 1.229       | 1.346     | 1.364  | 1.089   | 1.331      | 1.037  | 1.022            | 0.876           | 1.162      | 1.242     | 1.249     | 1.3          | 1.18         |
| sqrt(Xyl5)       | 0.7492      | 0.919     | 0.7974 | 0.9725  | 0.8272     | 0.9905 | 1.0301           | 0.8139          | 0.971      | 0.9929    | 0.9305    | 1.0059       | 1.0107       |
| sqrt(G3)         | 2.283       | 2.415     | 2.676  | 2.292   | 2.381      | 1.995  | 2.114            | 1.933           | 2.543      | 2.538     | 2.561     | 2.484        | 2.557        |
| sqrt(G4)         | 1.47        | 1.549     | 1.71   | 1.468   | 1.539      | 1.267  | 1.319            | 1.207           | 1.742      | 1.656     | 1.713     | 1.606        | 1.72         |
| sqrt(XA3XX)      | 1.981       | 2.212     | 2.235  | 1.834   | 2.05       | 1.503  | 1.639            | 1.481           | 1.912      | 1.834     | 1.919     | 1.792        | 1.904        |
| sqrt(XA2_3XX)    | 1.591       | 1.662     | 1.562  | 1.549   | 1.534      | 1.17   | 1.216            | 1.203           | 1.317      | 1.393     | 1.338     | 1.369        | 1.351        |
| sqrt(XA3A3XX)    | 1.0147      | 1.143     | 1.0832 | 0.8491  | 1.0625     | 0.6415 | 0.7786           | 0.601           | 0.83       | 0.8464    | 0.9102    | 0.8588       | 0.8514       |
| sqrt(XA3XA3XX)   | 0.4741      | 0.492     | 0.4556 | 0.4164  | 0.4647     | 0.3574 | 0.3986           | 0.3447          | 0.408      | 0.4179    | 0.3965    | 0.405        | 0.3774       |
| sqrt(XA3A2_3XX)  | 0.7703      | 0.767     | 0.71   | 0.715   | 0.7267     | 0.5797 | 0.5769           | 0.6107          | 0.591      | 0.684     | 0.6399    | 0.6707       | 0.6287       |
| sqrt(XA3XA2_3XX) | 1.0047      | 1.062     | 0.9882 | 0.9262  | 1.0685     | 0.8223 | 0.8642           | 0.8066          | 0.992      | 0.9573    | 0.9729    | 0.9368       | 0.9724       |



|                  | 200 kg N    |           |        |         |            |        |                  |                 |            |           |           |              |              | SEM     |
|------------------|-------------|-----------|--------|---------|------------|--------|------------------|-----------------|------------|-----------|-----------|--------------|--------------|---------|
|                  | bread wheat |           |        |         |            | emmer  |                  |                 | spelt      |           |           |              |              |         |
|                  | Akteur      | Bernstein | Capo   | Kometus | RGT Reform | Ramses | Roter Heidfelder | Späths Albjuwel | Attengauer | Bauländer | Comburger | Franckenkorn | Zollernspelt |         |
| sqrt(Xylose)     | 2.73        | 2.949     | 2.907  | 2.724   | 2.706      | 2.37   | 2.355            | 2.229           | 2.662      | 2.582     | 2.816     | 2.839        | 2.782        | 0.05276 |
| sqrt(Xyl2)       | 3.034       | 3.093     | 3.308  | 3.077   | 3.142      | 2.823  | 2.792            | 2.622           | 3.014      | 3.048     | 3.264     | 3.237        | 3.187        | 0.06071 |
| sqrt(Xyl3)       | 1.132       | 1.286     | 1.546  | 1.206   | 1.265      | 1.005  | 0.969            | 0.79            | 1.188      | 1.127     | 1.271     | 1.198        | 1.245        | 0.06147 |
| sqrt(Xyl5)       | 0.7476      | 0.8741    | 0.7281 | 0.9314  | 0.8437     | 0.9963 | 0.969            | 0.8121          | 1.0426     | 1.0294    | 0.8613    | 0.9366       | 0.9668       | 0.05498 |
| sqrt(G3)         | 2.181       | 2.349     | 2.584  | 2.267   | 2.249      | 1.903  | 1.974            | 1.88            | 2.465      | 2.393     | 2.473     | 2.407        | 2.417        | 0.04013 |
| sqrt(G4)         | 1.409       | 1.543     | 1.671  | 1.461   | 1.46       | 1.215  | 1.255            | 1.189           | 1.703      | 1.559     | 1.644     | 1.59         | 1.617        | 0.0264  |
| sqrt(XA3XX)      | 1.941       | 2.221     | 2.236  | 1.879   | 2.023      | 1.439  | 1.629            | 1.472           | 1.899      | 1.786     | 1.891     | 1.793        | 1.845        | 0.03066 |
| sqrt(XA2_3XX)    | 1.549       | 1.723     | 1.566  | 1.589   | 1.5        | 1.116  | 1.193            | 1.204           | 1.328      | 1.361     | 1.325     | 1.387        | 1.319        | 0.02533 |
| sqrt(XA3A3XX)    | 0.9538      | 1.1346    | 1.0389 | 0.8644  | 1.0434     | 0.6035 | 0.729            | 0.5869          | 0.855      | 0.8325    | 0.8751    | 0.8386       | 0.8344       | 0.02335 |
| sqrt(XA3XA3XX)   | 0.451       | 0.5123    | 0.4858 | 0.4265  | 0.4685     | 0.3416 | 0.388            | 0.3512          | 0.407      | 0.3936    | 0.404     | 0.4109       | 0.4028       | 0.0106  |
| sqrt(XA3A2_3XX)  | 0.7192      | 0.7626    | 0.7182 | 0.7361  | 0.7311     | 0.5479 | 0.568            | 0.6009          | 0.632      | 0.6851    | 0.6488    | 0.6793       | 0.6698       | 0.02053 |
| sqrt(XA3XA2_3XX) | 0.9624      | 1.0948    | 0.9952 | 0.9535  | 1.0401     | 0.7799 | 0.844            | 0.8255          | 0.9772     | 0.9252    | 0.9322    | 0.9435       | 0.9336       | 0.02188 |

Score Contribution (N-200-N100), weight=p1po1

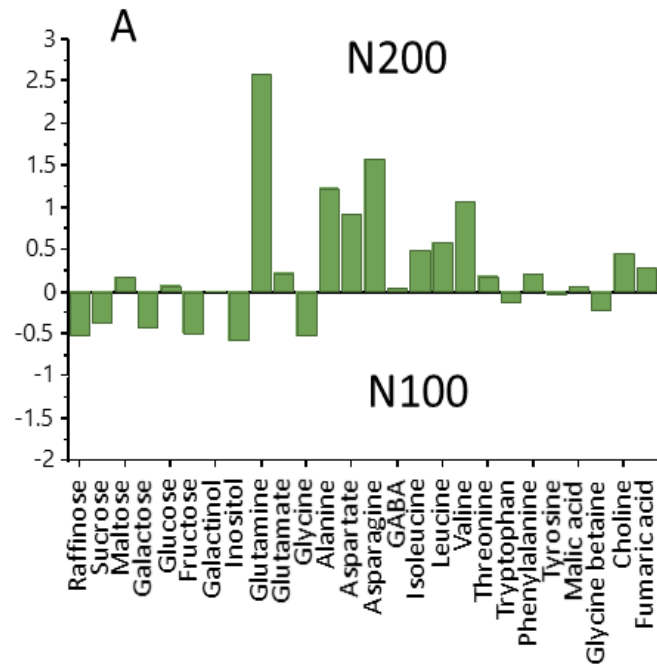

Score Contribution (Emmer vs Spelt), weight=p1p2

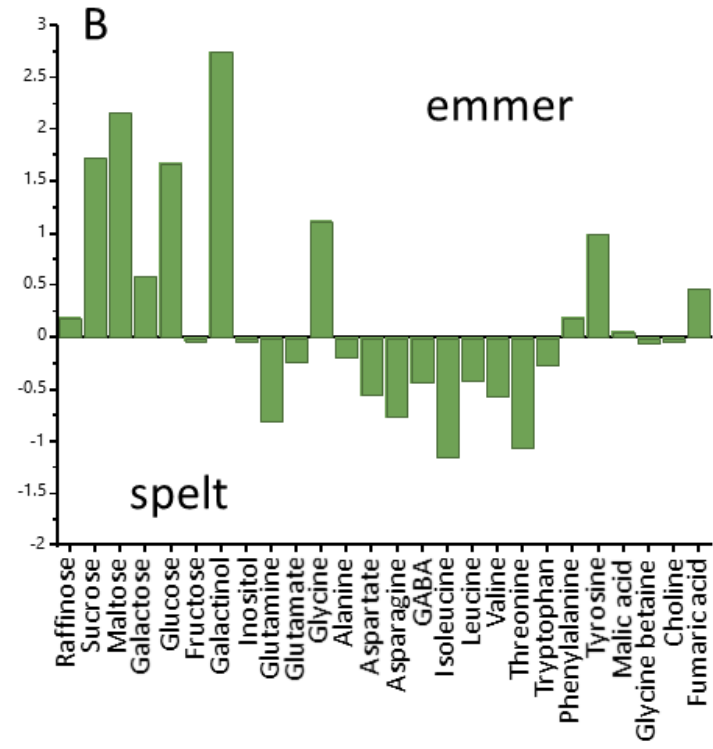

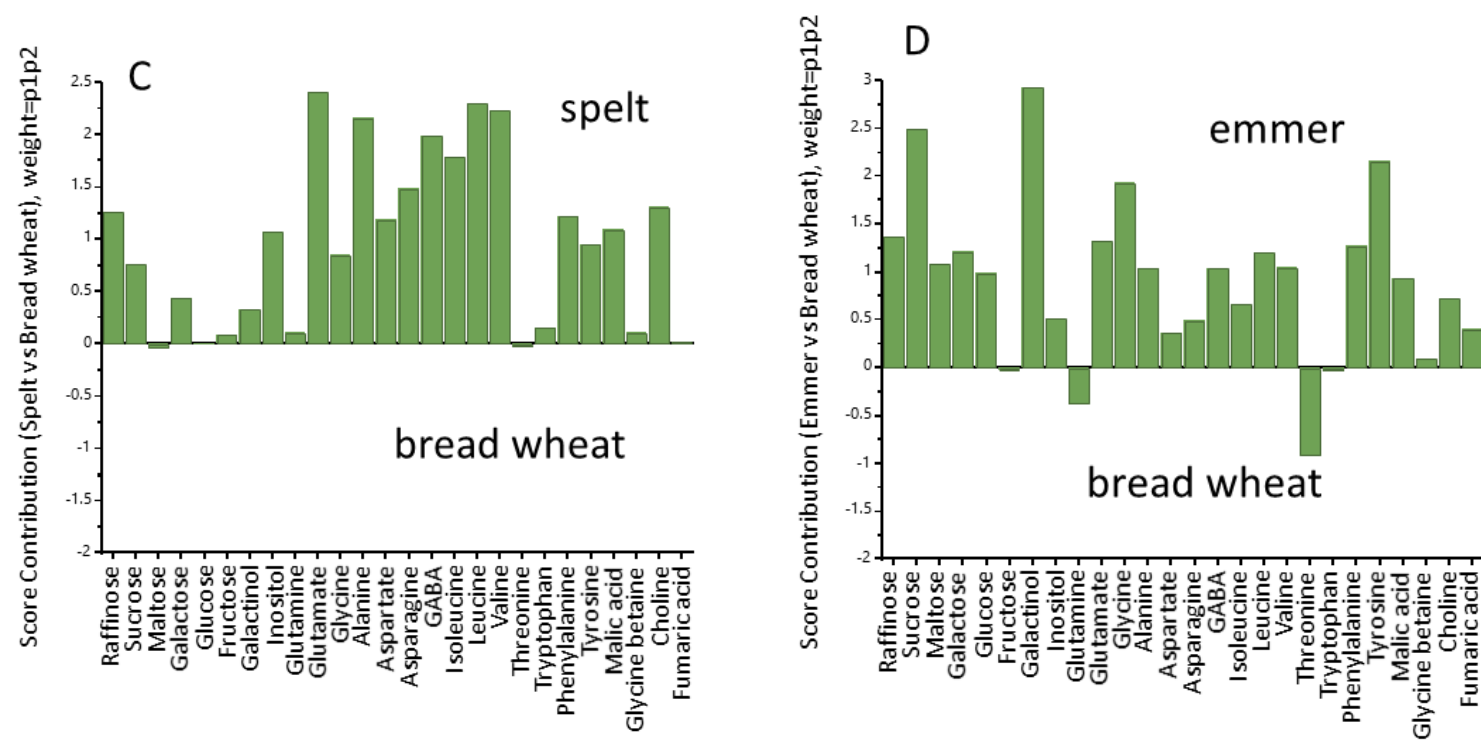

**Figure S1.** Difference plots showing the metabolites contributing to the separations in Figure 4B (A) and Figure 4C (B, C, D).

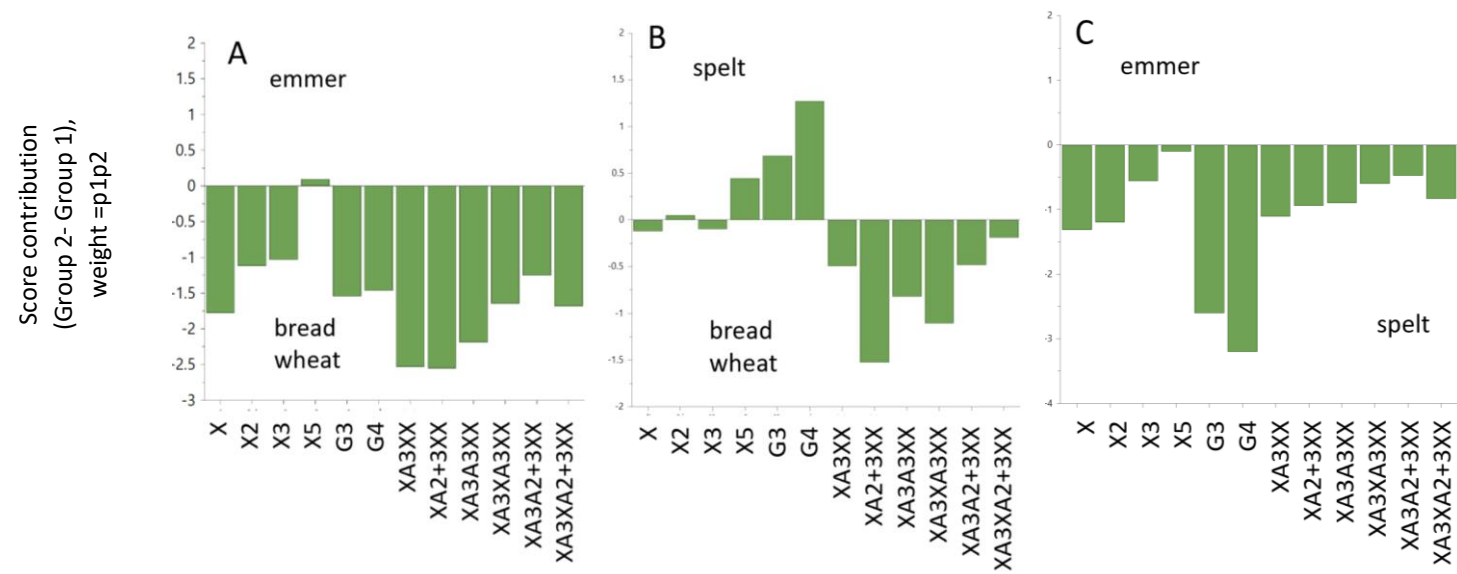

**Figure S2.** Difference plots showing the AXOS and GOS contributing to the separations in Figure 6A (A) and Figure 6B (B, C).
